# Supplementary material for: A retrospective comparative study of progression-free survival and overall survival between metachronous and synchronous metastatic renal cell carcinoma in intermediate- or poor-risk patients treated with VEGF-targeted therapy
Source: PubMed Central journal article supplement (PMC5706824; doi:10.18632/oncotarget.20674), 2017-09-06
Supplement: oncotarget-08-93633-s001.pdf [file oncotarget-08-93633-s001.pdf]

## A retrospective comparative study of progression-free survival and overall survival between metachronous and synchronous metastatic renal cell carcinoma in intermediate- or poor-risk patients treated with VEGF-targeted therapy

### SUPPLEMENTARY MATERIALS

Supplementary Table 1: Baseline characteristics table (N=118)

|                                                        | N(%) or Median (min-max)      |
|--------------------------------------------------------|-------------------------------|
| Age (years)                                            | 58 (34-81)                    |
| Gender (male/female)                                   | 94 (79.7)/24 (20.3)           |
| Nephrectomy                                            | 54 (45.8)                     |
| Metastatectomy                                         | 23 (19.5)                     |
| Treatment free interval, $\geq 1$ yr/ $< 1$ yr         | 27 (22.9)/91 (77.1)           |
| anemia                                                 | 86 (72.9)                     |
| hypercalcemia                                          | 15 (12.7)                     |
| Neutrophilia                                           | 22 (18.6)                     |
| elevated LDH                                           | 26 (22.0)                     |
| KPS $> 80$ / $\leq 80$                                 | 1115 (97.5)/3 (2.5)           |
| Thrombocytosis                                         | 14 (11.9)                     |
| Serum creatinine (mg/dL)                               | 1.2 (0.6-3.8)                 |
| Estimated GFR (mL/min/1.73 m)                          | 68.8 (22.3-142.1)             |
| Metastatic lesion                                      |                               |
| Lung                                                   | 85 (72.0)                     |
| Liver                                                  | 25 (21.2)                     |
| Lymph node                                             | 50 (42.4)                     |
| Bone                                                   | 42 (35.6)                     |
| Brain                                                  | 15 (12.7)                     |
| Number of metastatic lesions                           | 2 (1-4)                       |
| Heng, Intermediate risk                                | 93 (78.8)                     |
| Poor risk                                              | 25 (21.2)                     |
| CT or pT stage, T1 - T2/ T3 -T4                        | 51 (43.2)/37 (31.4)           |
| unknown                                                | 30 (25.4)                     |
| cN or pN stage, N0/ N1/ Nx                             | 30 (25.4)/30 (25.4)/15 (12.7) |
| unknown                                                | 43 (36.4)                     |
| Synchronous / Metachronous mRCC                        | 86 (72.9)/32 (27.1)           |
| Fuhrman nuclear grade, G1-G2 / G3-G4                   | 25 (21.2)/55 (46.6)           |
| unknown                                                | 38 (32.2)                     |
| Treatment duration (Month)                             | 5.0 (1.0-62.0)                |
| Follow-up duration (Month)                             | 59.3 (4.8-61.3)               |
| Progression free survival (Month)                      | 5.6 (1.0-62.0)                |
| Overall survival<br>(=Cancer specific survival, Month) | 12.8 (1.0-87.2)               |
| Survival/death                                         | 20 (17.0)/98 (83.0)           |
